# Supplementary material
Source: PubMed Central journal article supplement (PMC4245871)
Supplement: Supp_Table2.pdf [file Supp_Table2.pdf]

SUPPLEMENTARY TABLE S2. PRIMERS USED IN QUANTITATIVE POLYMERASE CHAIN REACTIONS

| <i>Gene product</i> | <i>Forward primer</i>        | <i>Reverse primer</i>          |
|---------------------|------------------------------|--------------------------------|
| <i>HMOX1</i>        | 5'-TGCTCAACATCCAGCTCTTTGA-3' | 5'-GCAGAATCTTGCACTTTGTTGCT-3'  |
| <i>GCLC</i>         | 5'-AAAGTCCGGTTGGTCCTGTC-3'   | 5'-GTATTGAACTCGGACATTGT-3'     |
| <i>GCLM</i>         | 5'-TCAAACCTTTCATCATCAAC-3'   | 5'-TTCAATTCCTCCCAGTAAG-3'      |
| <i>NQO1</i>         | 5'-GTTCATAGGAGAGTTTGCTT-3'   | 5'-TAGAACCTCAACTGACACTT-3'     |
| <i>TRDX1</i>        | 5'-CTGGAAGGAACGCTCTCGGA-3'   | 5'-GATAAGGTCATAGTCATAGG-3'     |
| <i>Hmox1</i>        | 5'-CACAGATGGCGTCACTTCGTC-3'  | 5'-GTGAGGACCCACTGGAGGAG-3'     |
| <i>Gclc</i>         | 5'-AATCAGCCCCGATTTAGTCAGG-3' | 5'-CCAGCTGTGCAACTCCAAGGAC-3'   |
| <i>Gclm</i>         | 5'-TTACCGAGGCTACGTGTCAGAC-3' | 5'-TATCGATGGTCAGGTCGATGTC-3'   |
| <i>Nqo1</i>         | 5'-GGTAGCGGCTCCATGTACTC-3'   | 5'-CATCCTTCCAGGATCTGCAT-3'     |
| <i>Acbt</i>         | 5'-TCCTTCCTGGGCATGGAG-3'     | 5'-AGGAGGAGCAATGATCTTGATCTT-3' |
